# Supplementary material
Source: PubMed Central journal article supplement (PMC5946738)
Supplement: Supp_Table1.pdf [file Supp_Table1.pdf]

## Supplementary Data

SUPPLEMENTARY TABLE S1. NOSOCOMIAL ISOLATES OF *KLEBSIELLA PNEUMONIAE* INCLUDED IN THIS STUDY

| <i>Strain ID</i> | <i>Age (years)<sup>a</sup></i> | <i>Hospital</i> | <i>Nosocomial infection</i> | <i>Specimen</i>        |
|------------------|--------------------------------|-----------------|-----------------------------|------------------------|
| RGV2             | Ukn                            | CMNLR           | Bacteremia                  | Blood                  |
| RGV3             | Ukn                            | CMNLR           | Bacteremia                  | Blood                  |
| RGV4             | Ukn                            | CMNLR           | Bacteremia                  | Blood                  |
| RGV5             | Ukn                            | CMNLR           | Bacteremia                  | Pericardial fluid      |
| RGV6             | Ukn                            | CMNLR           | Bacteremia                  | Blood                  |
| RGV7             | Ukn                            | CMNLR           | Bacteremia                  | Blood                  |
| RGV8             | Ukn                            | CMNLR           | Bacteremia                  | Blood                  |
| RGV9             | Ukn                            | CMNLR           | Bacteremia                  | Catheter               |
| RGV10            | Ukn                            | CMNLR           | UTI                         | Urine                  |
| 1kpn             | Ukn                            | CMNLR           | UTI                         | Urine                  |
| 2kpn             | Ukn                            | CMNLR           | UTI                         | Urine                  |
| 3kpn             | Ukn                            | CMNLR           | Pneumonia                   | Sputum                 |
| 4kpn             | Ukn                            | CMNLR           | UTI                         | Urine                  |
| INP1             | 0.9                            | INP             | Bacteremia                  | Blood                  |
| INP2             | 0.9                            | INP             | Bacteremia                  | Blood                  |
| INP3             | 0.08                           | INP             | Bacteremia                  | Blood                  |
| INP4             | 0.9                            | INP             | Bacteremia                  | Blood                  |
| INP5             | 0.3                            | INP             | Bacteremia                  | Blood                  |
| INP6             | 0.3                            | INP             | Bacteremia                  | Blood                  |
| INP7             | 0.4                            | INP             | Bacteremia                  | Blood                  |
| INP8             | 0.4                            | INP             | Bacteremia                  | Blood                  |
| INP9             | 0.01                           | INP             | Bacteremia                  | Blood                  |
| INP10            | 0.25                           | INP             | Bacteremia                  | Blood                  |
| INP11            | 0.25                           | INP             | Bacteremia                  | Blood                  |
| INP12            | 13                             | INP             | Bacteremia                  | Blood                  |
| INP13            | 0.05                           | INP             | Bacteremia                  | Blood                  |
| INP14            | 0.05                           | INP             | Bacteremia                  | Blood                  |
| INP15            | 0.05                           | INP             | Bacteremia                  | Blood                  |
| INP16            | 0.58                           | INP             | Bacteremia                  | Blood                  |
| INP17            | 9                              | INP             | Bacteremia                  | Blood                  |
| INP18            | 9                              | INP             | Bacteremia                  | Blood                  |
| INP19            | 0.08                           | INP             | Bacteremia                  | Blood                  |
| INP20            | 0.08                           | INP             | Bacteremia                  | Blood                  |
| INP21            | 0.08                           | INP             | Bacteremia                  | Blood                  |
| INP22            | 9                              | INP             | Bacteremia                  | Blood                  |
| INP23            | 6                              | INP             | Bacteremia                  | Blood                  |
| INP24            | 0.08                           | INP             | Bacteremia                  | Blood                  |
| INP25            | 2                              | INP             | UTI                         | Urine                  |
| INP26            | 6                              | INP             | UTI                         | Urine                  |
| INP27            | 0.038                          | INP             | WI                          | Umbilical swab         |
| INP28            | 0.33                           | INP             | Upper respiratory infection | Pharyngeal swab        |
| INP29            | 0.08                           | INP             | Pneumonia                   | Bronchoalveolar lavage |
| INP31            | 0.058                          | INP             | WI                          | Wound secretion        |
| Neon             | 0.01                           | NMC20N          | Diarrhea                    | Stool                  |
| 4/394            | 42                             | NMC20N          | Pneumonia                   | Bronchoalveolar lavage |
| 4/484            | 49                             | NMC20N          | Meningitis                  | Cerebrospinal fluid    |
| 6/71             | 13                             | NMC20N          | UTI                         | Urine                  |
| 7/447            | 80                             | NMC20N          | WI                          | Fistula secretion      |
| 7/450            | 63                             | NMC20N          | Pneumonia                   | Bronchoalveolar lavage |
| 11/411           | 52                             | NMC20N          | Meningitis                  | Cerebrospinal fluid    |
| 11/435           | 52                             | NMC20N          | Bacteremia                  | Catheter tip           |
| 12/420           | 42                             | NMC20N          | Pneumonia                   | Catheter tip           |
| 13/508           | 73                             | NMC20N          | Upper respiratory infection | Pharyngeal swab        |
| 14/413           | 63                             | NMC20N          | Pneumonia                   | Bronchoalveolar lavage |
| 14/416           | 32                             | NMC20N          | Pneumonia                   | Bronchoalveolar lavage |
| 15/378           | 75                             | NMC20N          | Upper respiratory infection | Pharyngeal swab        |
| 15/492           | 52                             | NMC20N          | Meningitis                  | Cerebrospinal fluid    |

(continued)

SUPPLEMENTARY TABLE S1. (CONTINUED)

| <i>Strain ID</i> | <i>Age (years)<sup>a</sup></i> | <i>Hospital</i> | <i>Nosocomial infection</i> | <i>Specimen</i>        |
|------------------|--------------------------------|-----------------|-----------------------------|------------------------|
| 15/493           | 42                             | NMC20N          | Meningitis                  | Cerebrospinal fluid    |
| 16/300           | 51                             | NMC20N          | Upper respiratory infection | Pharyngeal swab        |
| 17/391           | 38                             | NMC20N          | Bacteremia                  | Blood                  |
| 17/422           | 38                             | NMC20N          | Bacteremia                  | Catheter tip           |
| 20/460           | Ukn                            | NMC20N          | Pneumonia                   | Bronchoalveolar lavage |
| 21/364           | 31                             | NMC20N          | UTI                         | Urine                  |
| 21/368           | Ukn                            | NMC20N          | WI                          | Wound secretion        |
| 21/378           | 80                             | NMC20N          | Pneumonia                   | Sputum                 |
| 22/346           | 53                             | NMC20N          | WI                          | Wound secretion        |
| 25/400           | 38                             | NMC20N          | Bacteremia                  | Blood                  |
| 26/381           | Ukn                            | NMC20N          | WI                          | Wound secretion        |
| 26/402           | 52                             | NMC20N          | Pneumonia                   | Bronchial secretion    |
| 26/403           | Ukn                            | NMC20N          | Pneumonia                   | Bronchoalveolar lavage |
| 29/552           | 37                             | NMC20N          | Pneumonia                   | Sputum                 |
| H143             | Ukn                            | NMC20N          | Bacteremia                  | Blood                  |
| H215             | Ukn                            | NMC20N          | Bacteremia                  | Blood                  |
| H241-1           | 64                             | NMC20N          | Bacteremia                  | Blood                  |
| H241-2           | 64                             | NMC20N          | Bacteremia                  | Catheter tip           |
| H388             | Ukn                            | NMC20N          | Bacteremia                  | Blood                  |

Strains were isolated in the year of 2013.

<sup>a</sup>Age of patients, where strains were isolated from.

CMNLR, National medical center “La Raza” ; INP, National Institute of Perinatology; NMC20N, National Medical Center “20 de Noviembre”; Ukn, unknown; UTI, urinary tract infection; WI, wound infection.
